# Supplementary material for: Conformational diversity and environmental implications of trans-2-pentenal
Source: Royal Society of Chemistry journal article supplement (doi:10.1039/d3cp04204a), 2023-01-01
Supplement: d3cp04204a1.pdf [file d3cp04204a1.pdf]

## Electronic Supplementary Information

### Conformational Diversity and Environmental Implications of *Trans*-2-Pentenal

Sung Man Park and Chan Ho Kwon \*

*Department of Chemistry and Institute for Molecular Science and Fusion Technology, Kangwon National University, Chuncheon 24341, Korea*

**Table S1** The equilibrium geometries of the main *trans*-2-pentenal conformers in the ground electronic states calculated at the CAM-B3LYP/aug-cc-pVDZ level.

|                           | $S_0$         |                  | $D_0$                      |                  |
|---------------------------|---------------|------------------|----------------------------|------------------|
|                           | <i>tt-cis</i> | <i>tt-gauche</i> | <i>tt-cis</i>              | <i>tt-gauche</i> |
| <b>Bond length (Å)</b>    |               |                  |                            |                  |
| 1C-2O                     | 1.212         | 1.212            | 1.238 (0.026) <sup>a</sup> | 1.237 (0.025)    |
| 1C-3H                     | 1.116         | 1.116            | 1.115 (-0.001)             | 1.115 (-0.001)   |
| 1C-4C                     | 1.468         | 1.468            | 1.413 (-0.055)             | 1.415 (-0.053)   |
| 4C-5C                     | 1.338         | 1.338            | 1.366 (0.028)              | 1.365 (0.027)    |
| 5C-6C                     | 1.496         | 1.495            | 1.472 (-0.024)             | 1.472 (-0.023)   |
| 6C-7C                     | 1.523         | 1.531            | 1.521 (-0.002)             | 1.540 (0.009)    |
| 4C-8H                     | 1.090         | 1.092            | 1.088 (-0.002)             | 1.089 (-0.003)   |
| 5C-9H                     | 1.095         | 1.096            | 1.095 (0.000)              | 1.096 (0.000)    |
| 6C-10H                    | 1.102         | 1.098            | 1.106 (0.004)              | 1.096 (-0.002)   |
| 7C-12H                    | 1.098         | 1.097            | 1.097 (-0.001)             | 1.096 (-0.001)   |
| <b>Bond angle (°)</b>     |               |                  |                            |                  |
| 2O-1C-3H                  | 120.4         | 120.4            | 112.2 (-8.2)               | 112.3 (-8.1)     |
| 2O-1C-4C                  | 124.4         | 124.4            | 126.5 (2.1)                | 126.4 (2.0)      |
| 1C-4C-5C                  | 120.6         | 121.0            | 117.8 (-2.8)               | 118.0 (-3.0)     |
| 4C-5C-6C                  | 126.9         | 125.8            | 125.4 (-1.5)               | 124.8 (-1.0)     |
| 5C-6C-7C                  | 115.8         | 112.3            | 117.4 (1.6)                | 111.9 (-0.4)     |
| <b>Dihedral angle (°)</b> |               |                  |                            |                  |
| 2O-1C-4C-5C               | 180.0         | -179.9           | 180.0 (0.0)                | -179.7 (0.2)     |
| 1C-4C-5C-6C               | 180.0         | -179.7           | 180.0 (0.0)                | -179.9 (-0.2)    |
| 4C-5C-6C-7C               | 180.0         | -122.3           | 180.0 (0.0)                | -127.1 (-4.8)    |

<sup>a</sup> The values in parentheses denote the geometrical changes upon ionisation with respect to the neutral conformer.

**Table S2** Energetics data of *trans*-2-pentenal calculated at various levels.

| Level       | conformer         | $\Delta E (S_0)^a$ | IE     | $\Delta IE^b$ | Level           | $\Delta E (S_0)^a$ | IE     | $\Delta IE^b$ |
|-------------|-------------------|--------------------|--------|---------------|-----------------|--------------------|--------|---------------|
| B3LYP/      | <i>tt</i> -cis    | 0                  | 75,020 | 0             | M06-2x/         | 0                  | 77,239 | 0             |
|             | <i>tt</i> -gauche | -68                | 75,156 | 136           |                 | 160                | 77,394 | 155           |
| cc-pVTZ     | <i>tc</i> -cis    | 680                | 75,041 | 21            | aug-cc-pVTZ     | 706                | 77,285 | 46            |
|             | <i>tc</i> -gauche | 611                | 75,149 | 129           |                 | 858                | 77,455 | 216           |
| B3LYP/      | <i>tt</i> -cis    | 0                  | 75,248 | 0             | $\omega$ B97XD/ | 0                  | 75,240 | 0             |
|             | <i>tt</i> -gauche | -29                | 75,393 | 145           |                 | 73                 | 75,458 | 218           |
| aug-cc-pVTZ | <i>tc</i> -cis    | 762                | 75,191 | -57           | cc-pVTZ         | 581                | 75,379 | 139           |
|             | <i>tc</i> -gauche | 735                | 75,303 | 56            |                 | 670                | 75,576 | 336           |
| B3LYP/      | <i>tt</i> -cis    | 0                  | 75,391 | 0             | $\omega$ B97XD/ | 0                  | 75,609 | 0             |
|             | <i>tt</i> -gauche | -70                | 75,532 | 141           |                 | 102                | 75,845 | 236           |
| aug-cc-pVTZ | <i>tc</i> -cis    | 772                | 75,347 | -44           | aug-cc-pVDZ     | 658                | 75,680 | 72            |
|             | <i>tc</i> -gauche | 926                | 75,237 | -153          |                 | 780                | 75,898 | 289           |
| CAM-B3LYP/  | <i>tt</i> -cis    | 0                  | 75,758 | 0             | $\omega$ B97XD/ | 0                  | 75,504 | 0             |
|             | <i>tt</i> -gauche | -8                 | 75,987 | 229           |                 | 71                 | 75,729 | 225           |
| cc-pVTZ     | <i>tc</i> -cis    | 605                | 75,886 | 128           | aug-cc-pVTZ     | 674                | 75,582 | 78            |
|             | <i>tc</i> -gauche | 601                | 76,107 | 349           |                 | 764                | 75,786 | 282           |
| CAM-B3LYP/  | <i>tt</i> -cis    | 0                  | 75,964 | 0             | MP2/            | 0                  | 80,055 | 0             |
|             | <i>tt</i> -gauche | 27                 | 76,206 | 242           |                 | 14                 | 80,250 | 194           |
| aug-cc-pVDZ | <i>tc</i> -cis    | 700                | 76,016 | 52            | cc-pVDZ         | 705                | 80,354 | 298           |
|             | <i>tc</i> -gauche | 732                | 76,247 | 283           |                 | 709                | 80,555 | 499           |
| CAM-B3LYP/  | <i>tt</i> -cis    | 0                  | 76,123 | 0             | MP2/            | 0                  | 79,783 | 0             |
|             | <i>tt</i> -gauche | -11                | 76,360 | 236           |                 | -5                 | 79,997 | 213           |
| aug-cc-pVTZ | <i>tc</i> -cis    | 714                | 76,177 | 53            | aug-cc-pVDZ     | 799                | 80,022 | 238           |
|             | <i>tc</i> -gauche | 712                | 76,401 | 277           |                 | 788                | 80,240 | 457           |
| M06-2x/     | <i>tt</i> -cis    | 0                  | 77,000 | 0             | MP2/            | 0                  | 80,910 | 0             |
|             | <i>tt</i> -gauche | 158                | 77,150 | 150           |                 | 23                 | 81,109 | 199           |
| cc-pVTZ     | <i>tc</i> -cis    | 605                | 77,113 | 113           | aug-cc-pVTZ     | 806                | 81,135 | 225           |
|             | <i>tc</i> -gauche | 755                | 77,279 | 279           |                 | 826                | 81,336 | 426           |
| M06-2x/     | <i>tt</i> -cis    | 0                  | 76,370 | 0             |                 |                    |        |               |
|             | <i>tt</i> -gauche | 196                | 76,908 | 178           |                 |                    |        |               |
| aug-cc-pVDZ | <i>tc</i> -cis    | 705                | 76,770 | 40            |                 |                    |        |               |
|             | <i>tc</i> -gauche | 886                | 76,953 | 223           |                 |                    |        |               |

<sup>a</sup> Relative energies with zero-point energy correction for the other conformers with respect to the *tt*-cis conformer in both the neutral ( $S_0$ ) and cationic ( $D_0$ ) states. <sup>b</sup> Relative ionisation energies of the other conformers with respect to the *tt*-cis conformer.
